# Supplementary material
Source: HighWire-hosted journal article supplement (https://cmaj.ca/highwire/filestream/68782/field_highwire_adjunct_files/0/170599-res-1-at.pdf)
Supplement: 170599-res-1-at.pdf [file 170599-res-1-at.pdf]

**Appendix 1 (as supplied by the authors):** Primary outcome (mean symptom score for sore throat/difficulty swallowing) using complete cases only

|                        | Mean sore throat/difficulty swallowing score days 2-5 | Univariate difference (95% CI) | Multivariate difference** |
|------------------------|-------------------------------------------------------|--------------------------------|---------------------------|
| No probiotic (n=329)   | 2.71 (1.55)                                           |                                |                           |
| Probiotic (n=360)      | 2.76 (1.59)                                           | 0.05 (-0.19, 0.28)             | -0.06 (-0.31, 0.18)       |
|                        |                                                       |                                |                           |
| No chewing gum (n=219) | 2.72 (1.51)                                           |                                |                           |
| Sorbitol gum (n=234)   | 2.78 (1.56)                                           | 0.06 (-0.23, 0.35)             | 0.07 (-0.19, 0.33)        |
| Xylitol gum (n=236)    | 2.71 (1.65)                                           | -0.01 (-0.30, 0.28)            | 0.01 (-0.30, 0.30)        |
|                        |                                                       |                                |                           |
| No xylitol (n=453)     | 2.75 (1.53)                                           |                                |                           |
| Xylitol (n=236)        | 2.71 (1.65)                                           | -0.04 (-0.29, 0.21)            | -0.06 (-0.32, 0.20)       |

\*\*using multiple linear regression controlling for age, duration of current sore throat, number of sore throats in the past 3 months, prior tonsillectomy, inflamed pharynx, cough, temperature over 37.5, pus on tonsils, cervical nodes, ever smoked, Antibiotics prescribed (none, immediate, delayed).
